# Supplementary material for: Optimization of an Urban Monitoring Network for Retrieving an Unknown Point Source Emission
Source: Copernicus journal article supplement (doi:10.5194/gmd-2018-6), 2018-03-09
Supplement: Supplementary file 1 [file gmd-2018-6-supplement.zip]

Archive with 2 entries (2 files):
- Optimization_Code.tar.gz
- Supporting_Information_R1.pdf
